# Supplementary material
Source: PubMed Central journal article supplement (PMC9647774)
Supplement: PEDS_2021054268KSupplementaryData.pdf [file PEDS_2021054268KSupplementaryData.pdf]

## **SUPPLEMENTAL METHODS**

In both states, a variety of school sports occurred during the study period and schools operated under public health departments guidance for policies regarding face coverings during practices, games, and rules surrounding spectators. These practices varied during the study; for example, in North Carolina, masking policies for outdoor sports changed from required to optional during the study period. We did not collect specific data on sports policies, including adherence to policies on district-level.

In North Carolina, the following sports were in play at some point during the study period: football, golf, boys tennis, girls soccer, softball, baseball, girls tennis, track and field, wrestling. We did not track sport-associated infection by sport type during this study period. In Wisconsin, the following sports were in play during the study period: baseball, boys/girls cross country, football, boys/girls golf, boys/girls soccer, softball, girls swimming and diving, boys/girls tennis, boys/girls track and field, boys/girls volleyball. Not all school districts and not all schools that participated in the study fielded a team in all of the above sports.
